# Supplementary material for: Anion-templated silver thiolated clusters affected by carboxylate ligands
Source: Royal Society of Chemistry journal article supplement (doi:10.1039/d2dt02194c), 2022-01-01
Supplement: d2dt02194c1.pdf [file d2dt02194c1.pdf]

## Supporting Information

### Anion-templated silver thiolated clusters effected by carboxylate ligands

Yu-Han Xia, Xin-Yan Xia, Jun-Jie Fang, Zheng Liu, Yun-Peng Xie\*, and Xing Lu

*State Key Laboratory of Materials Processing and Die & Mould Technology, School of Materials Science and Engineering, Huazhong University of Science and Technology (HUST), Wuhan 430074, China. E-mail: xieyp@hust.edu.cn, lux@hust.edu.cn*

#### Contents

##### X-ray crystallography

**Fig. S1** The structure of  $V_{10}O_{28}^{6-}$  anion template.

**Fig. S2** The formation of **2** by covering two boat-shaped  $Ag_{16}$  on the tire-shaped  $Ag_{34}$  and wrapping  $V_{10}O_{28}^{6-}$  inside.

**Fig. S3** The FT-IR spectra of **1-3**.

**Fig. S4** The TG analysis of **1** and **2** (carried out in nitrogen atmospheres).

**Fig. S5** The UV-vis spectra of **1** and **2** (dissolved in  $CH_2Cl_2$ ).

**Table S1.** Crystal data and structure refinement for **1**

**Table S2.** Crystal data and structure refinement for **2**

**Table S3.** Crystal data and structure refinement for **3**

**Table S4.** Selected bond length in **1**.

**Table S5.** Selected bond length in **2**.

**Table S6.** Selected bond length in **3**.

##### X-ray crystallography

Single crystal X-ray data of **1-3** were collected on a Bruker D8 Quest diffractometer with Mo-K $\alpha$  radiation ( $\lambda = 0.71073 \text{ \AA}$ ). Data processing, absorption correction, integration and reduction were performed by multi-scan method and implemented in software Bruker APEX3 v2017.3-0. Space groups were determined using XPREP implemented in APEX3. The structures were further solved with the direct method and refined by full-matrix least-squares techniques against  $F_o^2$  using the SHELXL program<sup>1</sup> through the OLEX2 interface.<sup>2</sup> It was found that the solvent molecules in the crystal lattice were disordered, which were removed using solvent

mask command with OLEX2 program.<sup>2</sup> Appropriate restraints and constraints were applied to the geometric shape and atomic displacement parameters of the atoms in the cluster. The ADDSYM subroutine of PLATON<sup>3</sup> was used to check all structures to ensure that no additional symmetry could be applied to the model.

Crystallographic data parameters of **1-3** are given in Tables S1-S3.

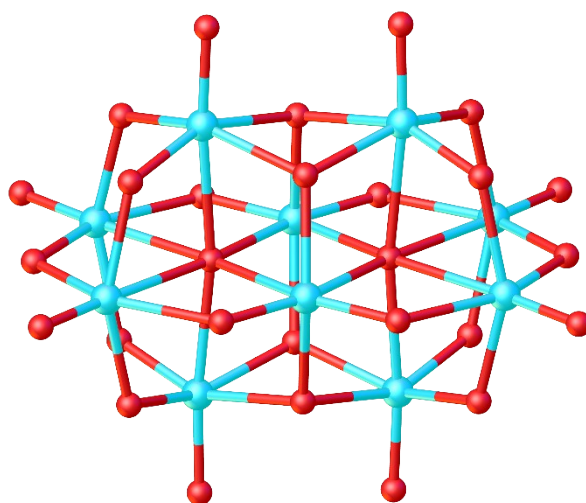

**Fig. S1** The structure of V<sub>10</sub>O<sub>28</sub><sup>6-</sup> anion template.

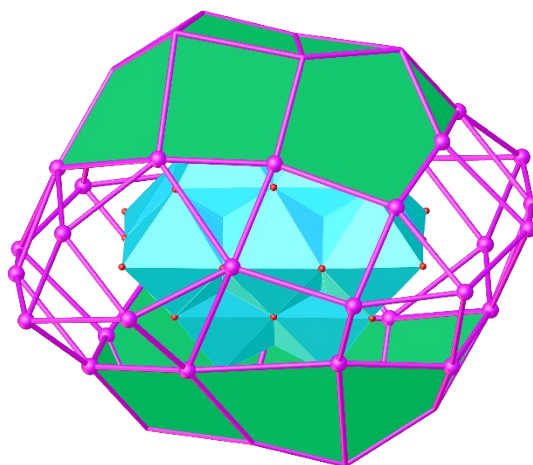

**Fig. S2** The formation of **2** by covering two boat-shaped Ag<sub>16</sub> on the tire-shaped Ag<sub>34</sub> and wrapping V<sub>10</sub>O<sub>28</sub><sup>6-</sup> inside.

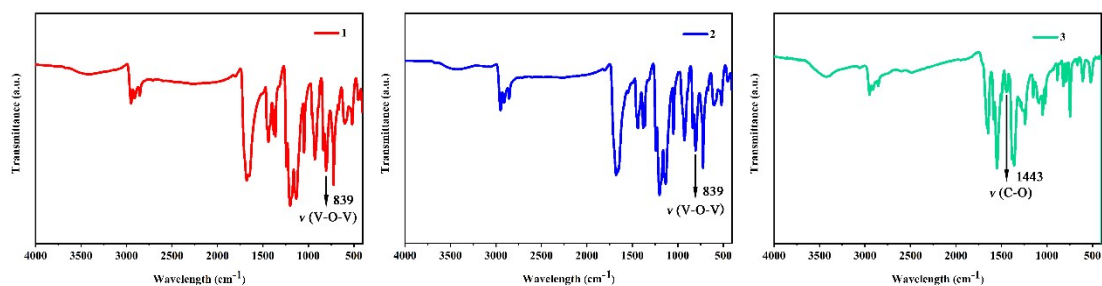

**Fig. S3** The FT-IR spectra of **1-3**.

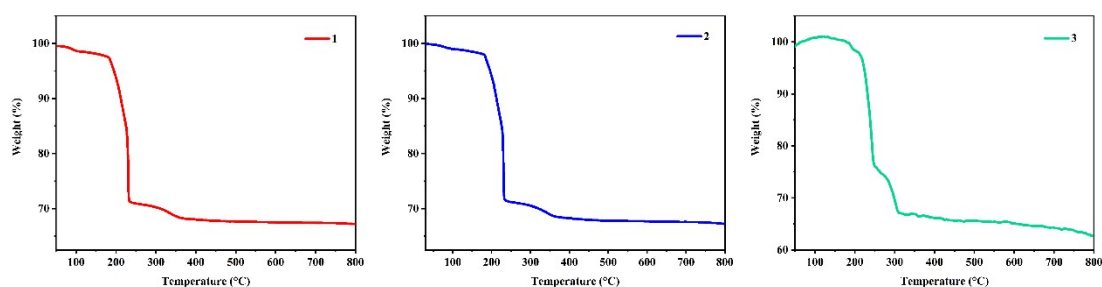

**Fig. S4** The TG analysis of **1** and **2** (carried out in nitrogen atmospheres).

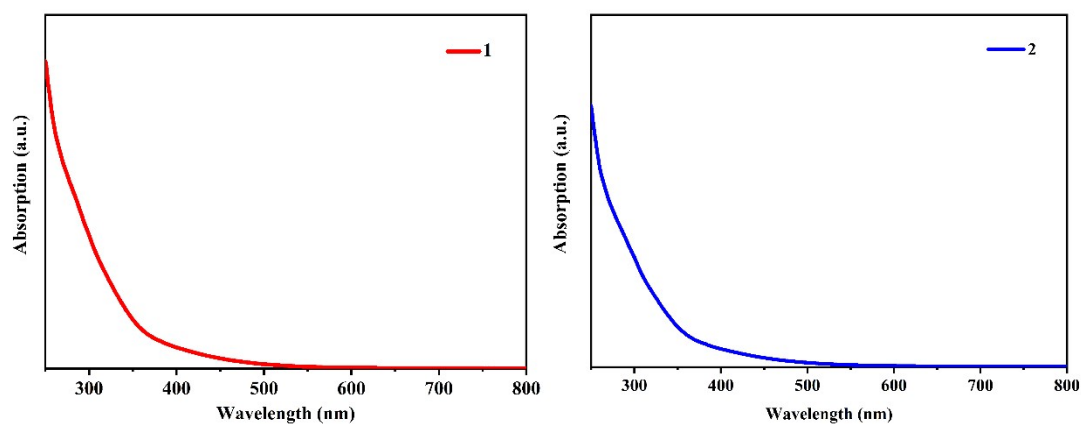

**Fig. S5** The UV-vis spectra of **1** and **2** (dissolved in  $\text{CH}_2\text{Cl}_2$ ).

**Table S1.** Crystal data and structure refinement for **1**

| Codes          | <b>1</b>                                                                                                   |
|----------------|------------------------------------------------------------------------------------------------------------|
| Formula        | $\text{C}_{114}\text{H}_{210}\text{Ag}_{46}\text{F}_{36}\text{N}_2\text{O}_{54}\text{S}_{28}\text{V}_{10}$ |
| $F_w$          | 9525.93                                                                                                    |
| Temperature/K  | 305.3                                                                                                      |
| Crystal system | monoclinic                                                                                                 |
| Space group    | $P2_1/c$                                                                                                   |
| $a/\text{\AA}$ | 18.1391(7)                                                                                                 |
| $b/\text{\AA}$ | 39.1409(16)                                                                                                |

|                                    |                                                            |
|------------------------------------|------------------------------------------------------------|
| $c/\text{\AA}$                     | 18.9060(9)                                                 |
| $\alpha/^\circ$                    | 90                                                         |
| $\beta/^\circ$                     | 114.1710(10)                                               |
| $\gamma/^\circ$                    | 90                                                         |
| Volume/ $\text{\AA}^3$             | 12246.1(9)                                                 |
| $Z$                                | 2                                                          |
| $\rho_{\text{calc}}/\text{g/cm}^3$ | 2.583                                                      |
| $\mu/\text{mm}^{-1}$               | 4.262                                                      |
| F(000)                             | 9008.0                                                     |
| $\lambda/\text{\AA}$               | MoK $\alpha$ ( $\lambda = 0.71073$ )                       |
| Independent reflections            | $R_{\text{int}} = 0.0695$ ,<br>$R_{\text{sigma}} = 0.0810$ |
| $GOF$ on $F^2$                     | 1.022                                                      |
| $R_I^a[I > 2\sigma(I)]$            | $R_1 = 0.0896$ , $wR_2 = 0.2222$                           |
| $wR_2^b(\text{all data})$          | $R_1 = 0.1568$ , $wR_2 = 0.2577$                           |

**Table S2.** Crystal data and structure refinement for **2**

| Codes                              | <b>2</b>                                                                                                   |
|------------------------------------|------------------------------------------------------------------------------------------------------------|
| Formula                            | $\text{C}_{132}\text{H}_{248}\text{Ag}_{46}\text{F}_{24}\text{N}_4\text{O}_{52}\text{S}_{30}\text{V}_{10}$ |
| $F_w$                              | 9612.55                                                                                                    |
| Temperature/K                      | 298.2                                                                                                      |
| Crystal system                     | monoclinic                                                                                                 |
| Space group                        | $P2_1/n$                                                                                                   |
| $a/\text{\AA}$                     | 20.0954(6)                                                                                                 |
| $b/\text{\AA}$                     | 28.1776(9)                                                                                                 |
| $c/\text{\AA}$                     | 22.1646(8)                                                                                                 |
| $\alpha/^\circ$                    | 90                                                                                                         |
| $\beta/^\circ$                     | 93.5630(10)                                                                                                |
| $\gamma/^\circ$                    | 90                                                                                                         |
| Volume/ $\text{\AA}^3$             | 12526.2(7)                                                                                                 |
| $Z$                                | 2                                                                                                          |
| $\rho_{\text{calc}}/\text{g/cm}^3$ | 2.549                                                                                                      |
| $\mu/\text{mm}^{-1}$               | 4.177                                                                                                      |
| F(000)                             | 9148.0                                                                                                     |
| $\lambda/\text{\AA}$               | MoK $\alpha$ ( $\lambda = 0.71073$ )                                                                       |
| Independent reflections            | $R_{\text{int}} = 0.0583$ ,<br>$R_{\text{sigma}} = 0.0605$                                                 |
| $GOF$ on $F^2$                     | 1.025                                                                                                      |
| $R_I^a[I > 2\sigma(I)]$            | $R_1 = 0.0578$ , $wR_2 = 0.1318$                                                                           |
| $wR_2^b(\text{all data})$          | $R_1 = 0.1011$ , $wR_2 = 0.1521$                                                                           |

**Table S3.** Crystal data and structure refinement for **3**

| Codes | <b>3</b> |
|-------|----------|
|-------|----------|

|                           |                                              |
|---------------------------|----------------------------------------------|
| Formula                   | $C_{35}H_{46}Ag_{10}O_{12}S_{5.5}$           |
| $F_w$                     | 1913.75                                      |
| Temperature/K             | 296.3                                        |
| Crystal system            | monoclinic                                   |
| Space group               | C2/c                                         |
| $a/\text{\AA}$            | 30.032(2)                                    |
| $b/\text{\AA}$            | 26.7363(18)                                  |
| $c/\text{\AA}$            | 15.9173(12)                                  |
| $\alpha/^\circ$           | 90                                           |
| $\beta/^\circ$            | 97.531(2)                                    |
| $\gamma/^\circ$           | 90                                           |
| Volume/ $\text{\AA}^3$    | 12670.4(16)                                  |
| $Z$                       | 8                                            |
| $\rho_{calc}/\text{cm}^3$ | 2.006                                        |
| $\mu/\text{mm}^{-1}$      | 3.242                                        |
| F(000)                    | 7280.0                                       |
| $\lambda/\text{\AA}$      | MoK $\alpha$ ( $\lambda = 0.71073$ )         |
| Independent reflections   | $R_{int} = 0.0489$ ,<br>$R_{sigma} = 0.0647$ |
| GOF on $F^2$              | 1.046                                        |
| $R_I^a[I > 2\sigma(I)]$   | $R_1 = 0.0799$ , $wR_2 = 0.1953$             |
| $wR_2^b(\text{all data})$ | $R_1 = 0.1454$ , $wR_2 = 0.2505$             |

$$^a R_1 = \frac{\sum \|F_o\| - |F_c|}{\sum |F_o|} \quad ^b wR_2 = \left\{ \frac{\sum [w(F_o^2 - F_c^2)]^2}{\sum [w(F_o^2)]^2} \right\}^{1/2}$$

**Table S4.** Selected bond length in **1**.

|                       |           |                    |           |
|-----------------------|-----------|--------------------|-----------|
| Ag5-Ag6               | 3.003(2)  | Ag3-Ag27           | 3.020(3)  |
| Ag5-Ag16              | 3.162(3)  | Ag8-Ag14           | 3.110(2)  |
| Ag5-Ag10 <sup>1</sup> | 3.151(3)  | Ag8-S5             | 2.526(6)  |
| Ag5-Ag11 <sup>1</sup> | 3.158(3)  | Ag8-O13            | 2.572(9)  |
| Ag5-S12 <sup>1</sup>  | 2.493(4)  | Ag8-Ag9            | 3.068(5)  |
| Ag5-S3                | 2.462(5)  | Ag8-S7             | 2.413(8)  |
| Ag5-O3                | 2.423(8)  | Ag8-O20            | 2.460(3)  |
| Ag6-Ag16              | 3.277(2)  | Ag8-O9A            | 2.440(5)  |
| Ag6-S12 <sup>1</sup>  | 2.544(5)  | V4-V5              | 3.045(3)  |
| Ag6-S4                | 2.511(5)  | V4-O5              | 2.277(8)  |
| Ag6-O12               | 2.474(8)  | V4-O6 <sup>1</sup> | 2.050(9)  |
| Ag6-O27 <sup>1</sup>  | 2.479(14) | V4-O7              | 1.865(10) |
| Ag19-Ag20             | 3.000(2)  | V4-O2              | 1.932(10) |
| Ag19-Ag18             | 3.214(9)  | V4-O11             | 1.843(9)  |
| Ag19-S11              | 2.526(5)  | V4-O4              | 1.596(9)  |
| Ag19-S1               | 2.397(5)  | V4-V1              | 3.108(3)  |

|                        |           |                       |           |
|------------------------|-----------|-----------------------|-----------|
| Ag19-O2                | 2.504(8)  | V5-O5                 | 2.272(8)  |
| Ag16-Ag15              | 3.322(4)  | V5-O12                | 2.049(9)  |
| Ag16-S4                | 2.483(5)  | V5-O11                | 1.842(9)  |
| Ag16-S3                | 2.549(6)  | V5-O10                | 1.871(10) |
| Ag16-S9                | 2.663(5)  | V5-O13                | 1.902(10) |
| Ag16-O10               | 2.528(9)  | V5-O14                | 1.613(9)  |
| Ag1-Ag8 <sup>1</sup>   | 3.125(3)  | V5-V1                 | 3.088(3)  |
| Ag1-S1                 | 2.421(5)  | Ag2-S1                | 2.420(6)  |
| Ag1-S51                | 2.476(6)  | Ag2-S2                | 2.456(7)  |
| Ag7-Ag15               | 3.279(3)  | Ag2-O9 <sup>1</sup>   | 2.581(9)  |
| Ag7-Ag14               | 3.075(19) | Ag2-O66A <sup>1</sup> | 2.130(6)  |
| Ag7-S4                 | 2.513(5)  | Ag15-Ag14             | 2.987(9)  |
| Ag7-S5                 | 2.523(6)  | Ag15-S4               | 2.533(5)  |
| Ag7-O18                | 2.300(8)  | Ag15-S8               | 2.525(6)  |
| Ag7-O2A                | 2.420(7)  | Ag15-O17              | 2.380(3)  |
| Ag7-Ag26               | 2.924(14) | Ag15-Ag26             | 2.996(14) |
| Ag21-Ag22              | 2.913(4)  | Ag4-S3                | 2.480(9)  |
| Ag21-S11               | 2.447(5)  | Ag4-O16               | 2.380(3)  |
| Ag21-S13               | 2.455(6)  | Ag14-S5               | 2.444(13) |
| Ag21-Ag4A              | 3.200(2)  | Ag14-O14              | 2.570(2)  |
| Ag21-O25               | 2.270(3)  | Ag14-Ag13             | 2.790(3)  |
| Ag21-Ag25              | 3.160(4)  | Ag14-S8               | 2.291(17) |
| Ag20-S12               | 2.446(5)  | Ag22-S13              | 2.605(7)  |
| Ag20-S11               | 2.438(5)  | Ag22-S14              | 2.422(7)  |
| Ag20-O26               | 2.462(16) | Ag22-Ag12             | 2.900(6)  |
| Ag20-Ag4A              | 3.078(19) | Ag22-O24              | 2.340(3)  |
| Ag10-S3 <sup>1</sup>   | 2.796(6)  | Ag22-O22              | 2.440(6)  |
| Ag10-S2 <sup>1</sup>   | 2.472(6)  | S12-Ag4A              | 2.301(9)  |
| Ag10-S6                | 2.431(6)  | S11-Ag25              | 2.572(17) |
| Ag10-Ag6A              | 3.044(9)  | S3-Ag27               | 2.400(3)  |
| Ag10-Ag27 <sup>1</sup> | 3.340(4)  | S13-Ag12              | 2.333(6)  |
| Ag23-Ag17              | 2.943(8)  | S13-Ag8A              | 2.700(10) |
| Ag23-S9                | 2.505(7)  | S13-Ag4A              | 2.219(12) |
| Ag23-S14               | 2.448(6)  | S5-Ag26               | 2.490(2)  |
| Ag23-Ag13              | 3.249(12) | S9-Ag                 | 2.530(2)  |
| Ag23-S8                | 2.936(7)  | S14-Ag8A              | 2.691(11) |
| Ag23-Ag24              | 2.698(8)  | S14-Ag24              | 2.684(13) |
| Ag18-Ag17              | 2.900(3)  | S14-Ag25              | 2.380(2)  |
| Ag18-S11               | 2.728(19) | S10-Ag                | 2.460(4)  |
| Ag18-S14               | 2.528(10) | S10-Ag25              | 2.920(5)  |
| Ag18-S10               | 2.470(16) | S2-Ag27               | 2.620(3)  |
| Ag17-Ag3               | 2.962(5)  | O5-V1                 | 2.238(8)  |
| Ag17-Ag4               | 2.969(17) | O3-V1                 | 2.035(8)  |

|                    |           |                    |           |
|--------------------|-----------|--------------------|-----------|
| Ag17-S9            | 2.366(6)  | O8-V1 <sup>1</sup> | 1.991(8)  |
| Ag17-S10           | 2.395(7)  | O7-Ag7A            | 2.507(11) |
| V2-V4 <sup>1</sup> | 3.069(3)  | O2-V1              | 1.790(8)  |
| V2-V5              | 3.064(3)  | O10-V1             | 1.822(9)  |
| V2-O5 <sup>1</sup> | 2.148(8)  | O1-V1              | 1.626(10) |
| V2-O5              | 2.137(8)  | S6-Ag9             | 2.407(8)  |
| V2-O3              | 1.915(9)  | S6-Ag7A            | 2.493(12) |
| V2-O8              | 1.899(9)  | S6-Ag6A            | 2.438(8)  |
| V2-O6              | 1.689(8)  | Ag9-Ag12           | 2.909(9)  |
| V2-O12             | 1.704(9)  | Ag9-S7             | 2.638(10) |
| Ag11-S12           | 2.622(6)  | Ag9-O21            | 2.390(3)  |
| Ag11-S13           | 2.649(6)  | Ag12-S7            | 2.213(8)  |
| Ag11-S6            | 2.475(7)  | Ag13-S8            | 2.427(9)  |
| Ag11-Ag12          | 3.013(5)  | Ag13-S7            | 2.259(12) |
| V3-V4              | 3.089(3)  | S8-Ag24            | 2.789(11) |
| V3-V5              | 3.114(3)  | S8-Ag26            | 2.547(13) |
| V3-O5              | 2.231(8)  | S7-Ag8A            | 2.948(12) |
| V3-O3 <sup>1</sup> | 2.022(9)  | S7-Ag7A            | 2.573(12) |
| V3-O8              | 1.967(9)  | S7-Ag24            | 2.665(12) |
| V3-O7              | 1.838(8)  | Ag8A-Ag7A          | 3.303(14) |
| V3-O13             | 1.826(9)  | Ag8A-Ag24          | 2.322(13) |
| V3-O9              | 1.626(9)  | Ag8A-O22A          | 2.400(5)  |
| V3-V1 <sup>1</sup> | 3.078(3)  | Ag7A-Ag6A          | 2.791(18) |
| Ag3-Ag2            | 2.972(4)  | Ag7A-Ag4A          | 2.980(2)  |
| Ag3-Ag4            | 3.041(12) | Ag6A-O9A           | 2.550(9)  |
| Ag3-S10            | 2.405(7)  | Ag-Ag27            | 3.320(5)  |
| Ag3-S2             | 2.420(7)  | O64A-Ag26          | 2.460(5)  |
| Ag3-Ag             | 3.000(3)  | Ag27-O15A          | 2.490(7)  |

<sup>1</sup>1-X, 1-Y, 1-Z

**Table S5.** Selected bond length in **2**.

|                       |            |                      |            |
|-----------------------|------------|----------------------|------------|
| Ag21-Ag6 <sup>1</sup> | 3.1957(14) | Ag5-S12              | 2.485(3)   |
| Ag21-Ag12             | 3.2113(14) | Ag5-O26 <sup>1</sup> | 2.421(12)  |
| Ag21-Ag22             | 3.1041(14) | Ag8-Ag16             | 3.283(15)  |
| Ag21-S8               | 2.463(3)   | Ag8-Ag9              | 3.024(10)  |
| Ag21-S9               | 2.471(3)   | Ag8-S6               | 2.438(4)   |
| Ag21-O7               | 2.344(5)   | Ag8-S11              | 2.424(5)   |
| Ag21-Ag25             | 3.241(4)   | Ag8-O20              | 2.510(2)   |
| Ag3-Ag2               | 3.2580(13) | Ag18-Ag17            | 2.650(2)   |
| Ag3-Ag11 <sup>1</sup> | 3.1383(15) | Ag18-S15             | 2.404(4)   |
| Ag3-S3                | 2.474(3)   | Ag18-S14             | 2.366(4)   |
| Ag3-S4                | 2.422(3)   | V3-V1 <sup>1</sup>   | 3.0672(19) |

|                      |            |                     |            |
|----------------------|------------|---------------------|------------|
| Ag6-Ag7              | 3.3768(15) | V3-V5               | 3.0635(19) |
| Ag6-S5               | 2.466(3)   | V3-O5 <sup>1</sup>  | 2.133(5)   |
| Ag6-S9 <sup>1</sup>  | 2.590(3)   | V3-O5               | 2.131(5)   |
| Ag6-S1 <sup>1</sup>  | 2.586(3)   | V3-O8               | 1.894(5)   |
| Ag6-O3               | 2.473(5)   | V3-O13              | 1.678(5)   |
| Ag12-Ag51            | 3.1874(18) | V3-O7               | 1.922(5)   |
| Ag12-S8              | 2.638(3)   | V3-O9               | 1.698(5)   |
| Ag12-S5 <sup>1</sup> | 2.536(3)   | V4-V2 <sup>1</sup>  | 3.0779(19) |
| Ag12-O9              | 2.462(5)   | V4-V1               | 3.0981(19) |
| Ag12-O25             | 2.368(10)  | V4-V5               | 3.0963(18) |
| Ag19-Ag2             | 2.9532(15) | V4-O5               | 2.247(5)   |
| Ag19-Ag20            | 3.0513(17) | V4-O8               | 1.978(5)   |
| Ag19-Ag1             | 3.1298(16) | V4-O7 <sup>1</sup>  | 2.042(6)   |
| Ag19-Ag18            | 2.940(5)   | V4-O3               | 1.834(6)   |
| Ag19-S15             | 2.411(3)   | V4-O6               | 1.614(5)   |
| Ag19-S1              | 2.380(3)   | V4-O12              | 1.806(5)   |
| Ag19-Ag0L            | 2.947(16)  | Ag16-S12            | 2.430(5)   |
| Ag2-S3               | 2.629(3)   | Ag16-S11            | 2.355(6)   |
| Ag2-S15              | 2.594(3)   | Ag16-S13            | 2.945(15)  |
| Ag2-S2               | 2.459(3)   | V2-V1               | 3.1028(19) |
| Ag22-Ag23            | 3.0603(18) | V2-V5               | 3.073(2)   |
| Ag22-S9              | 2.613(3)   | V2-O5               | 2.220(5)   |
| Ag22-S10             | 2.479(3)   | V2-O8 <sup>1</sup>  | 1.979(5)   |
| Ag22-S14             | 2.565(3)   | V2-O7               | 2.025(5)   |
| Ag15-Ag7             | 2.9897(15) | V2-O2               | 1.801(5)   |
| Ag15-Ag8             | 3.023(11)  | V2-O4               | 1.604(5)   |
| Ag15-Ag16            | 3.115(12)  | V2-O11              | 1.834(6)   |
| Ag15-S12             | 2.485(3)   | V1-V5               | 3.026(2)   |
| Ag15-S6              | 2.526(4)   | V1-O5               | 2.292(5)   |
| Ag15-O18             | 2.530(2)   | V1-O2               | 1.909(6)   |
| Ag15-O19             | 2.418(11)  | V1-O9 <sup>1</sup>  | 2.049(6)   |
| Ag4-Ag5              | 3.1966(19) | V1-O3               | 1.845(5)   |
| Ag4-Ag16             | 3.242(5)   | V1-O10              | 1.830(6)   |
| Ag4-S4               | 2.406(3)   | V1-O1               | 1.606(5)   |
| Ag4-S12              | 2.482(3)   | Ag9-S7              | 2.601(4)   |
| Ag4-Ag0O             | 3.072(8)   | Ag9-S2 <sup>1</sup> | 2.556(4)   |
| Ag7-Ag5              | 3.0020(19) | Ag9-S11             | 2.966(8)   |
| Ag7-S5               | 2.500(3)   | Ag9-O21             | 2.330(3)   |
| Ag7-S6               | 2.480(3)   | V5-O5               | 2.276(5)   |
| Ag7-O17              | 2.230(3)   | V5-O13              | 2.069(5)   |
| Ag11-Ag10            | 3.0838(17) | V5-O10              | 1.826(6)   |
| Ag11-Ag13            | 3.059(3)   | V5-O12              | 1.913(5)   |
| Ag11-S8              | 2.548(3)   | V5-O11              | 1.861(6)   |



|                       |           |                      |           |
|-----------------------|-----------|----------------------|-----------|
| Ag11-S31              | 2.508(3)  | V5-O14               | 1.594(6)  |
| Ag11-O25              | 2.597(10) | Ag17-S4              | 2.359(6)  |
| Ag11-O24              | 2.532(13) | Ag17-S14             | 2.429(5)  |
| Ag10-Ag13             | 3.050(3)  | S8-Ag25              | 2.725(6)  |
| Ag10-S3 <sup>1</sup>  | 2.509(3)  | S4-Ag0T              | 2.686(15) |
| Ag10-S7               | 2.498(3)  | S7-Ag25              | 2.692(6)  |
| Ag10-Ag0R             | 3.185(14) | S7-Ag0R              | 2.440(5)  |
| Ag10-O23              | 2.350(15) | S7-Ag27              | 2.146(6)  |
| Ag10-O4A              | 2.310(6)  | S15-Ag0L             | 2.403(11) |
| Ag10-O22              | 2.528(17) | S12-Ag0O             | 2.661(12) |
| Ag10-O22A             | 2.521(19) | S10-Ag24             | 2.359(5)  |
| Ag20-Ag18             | 3.040(7)  | S10-Ag25             | 2.524(8)  |
| Ag20-S9               | 2.491(3)  | S2-Ag0R <sup>1</sup> | 2.415(6)  |
| Ag20-O16              | 2.360(2)  | S2-Ag26 <sup>1</sup> | 2.850(3)  |
| Ag20-O12A             | 2.100(4)  | S6-Ag26              | 2.790(3)  |
| Ag20-Ag0L             | 2.950(15) | S14-Ag0T             | 2.609(9)  |
| Ag1-Ag8 <sup>1</sup>  | 3.149(9)  | S14-Ag0L             | 2.549(14) |
| Ag1-S1                | 2.525(3)  | S11-Ag24             | 2.660(6)  |
| Ag1-S2                | 2.473(4)  | S11-Ag27             | 2.078(6)  |
| Ag1-S6 <sup>1</sup>   | 2.741(3)  | S11-Ag26             | 2.522(10) |
| Ag1-Ag26 <sup>1</sup> | 2.844(9)  | S11-Ag0O             | 2.616(12) |
| Ag13-Ag14             | 2.983(3)  | S13-Ag0O             | 2.300(2)  |
| Ag13-S8               | 2.354(3)  | S13-Ag0T             | 2.410(17) |
| Ag13-S7               | 2.384(3)  | Ag24-Ag27            | 2.832(9)  |
| Ag14-Ag23             | 2.951(2)  | Ag24-Ag0O            | 2.775(12) |
| Ag14-S7               | 2.767(3)  | Ag25-Ag27            | 3.028(7)  |
| Ag14-S10              | 2.551(3)  | Ag0R-Ag27            | 2.720(15) |
| Ag14-S11              | 2.519(3)  | Ag0R-Ag26            | 3.250(4)  |
| Ag14-O11              | 2.521(5)  | Ag27-Ag26            | 3.260(3)  |
| Ag23-S10              | 2.403(3)  | Ag26-O27             | 2.080(5)  |
| Ag23-S13              | 2.384(5)  | O11A-Ag0L            | 2.570(4)  |
| Ag5-S5                | 2.506(3)  |                      |           |

<sup>1</sup>1-X, 1-Y, 1-Z

**Table S6.** Selected bond length in **3**.

|                      |            |                      |          |
|----------------------|------------|----------------------|----------|
| Ag3-Ag2              | 2.9809(18) | Ag8-S2               | 2.388(4) |
| Ag3-Ag4              | 2.9718(19) | Ag8-S6               | 2.390(5) |
| Ag3-Ag7 <sup>1</sup> | 3.164(6)   | Ag8-O2               | 2.560(2) |
| Ag3-S6 <sup>1</sup>  | 2.600(5)   | Ag6-Ag5              | 2.847(7) |
| Ag3-S3               | 2.547(5)   | Ag6-Ag1 <sup>1</sup> | 3.146(3) |
| Ag3-O7               | 2.321(12)  | Ag6-S2 <sup>1</sup>  | 2.505(5) |
| Ag3-O6               | 2.350(2)   | Ag6-S5               | 2.429(5) |

|                       |           |                     |           |
|-----------------------|-----------|---------------------|-----------|
| Ag3-Ag0B <sup>1</sup> | 3.341(10) | Ag6-O10             | 2.278(11) |
| Ag3-O6A               | 2.410(4)  | Ag6-Ag              | 3.170(5)  |
| Ag9-Ag10              | 3.109(2)  | Ag5-S4              | 2.532(9)  |
| Ag9-Ag6 <sup>2</sup>  | 3.283(2)  | Ag5-S2 <sup>1</sup> | 2.652(14) |
| Ag9-Ag5 <sup>2</sup>  | 3.131(6)  | Ag5-O9              | 2.261(15) |
| Ag9-Ag7 <sup>2</sup>  | 3.290(4)  | Ag1-S2              | 2.424(5)  |
| Ag9-S4 <sup>2</sup>   | 2.486(4)  | Ag1-S3              | 2.416(4)  |
| Ag9-S5 <sup>2</sup>   | 2.506(5)  | Ag7-S6              | 2.393(5)  |
| Ag9-O11               | 2.343(15) | Ag7-S5              | 2.475(6)  |
| Ag9-Ag <sup>2</sup>   | 3.123(18) | Ag7-O3 <sup>1</sup> | 2.580(3)  |
| Ag2-Ag6 <sup>1</sup>  | 3.199(2)  | S4-Ag               | 2.340(16) |
| Ag2-Ag1               | 3.040(2)  | S1-O2               | 1.409(17) |
| Ag2-Ag7 <sup>1</sup>  | 3.083(5)  | S1-O2 <sup>1</sup>  | 1.409(17) |
| Ag2-S3                | 2.515(5)  | S1-O1               | 1.600(3)  |
| Ag2-S5 <sup>1</sup>   | 2.510(5)  | S1-O1 <sup>1</sup>  | 1.600(3)  |
| Ag2-O5                | 2.370(3)  | S1-O4               | 1.200(3)  |
| Ag2-Ag0B <sup>1</sup> | 3.199(9)  | S1-O4 <sup>1</sup>  | 1.200(3)  |
| Ag2-O5A               | 2.190(6)  | S1-O3               | 1.380(2)  |
| Ag4-Ag8 <sup>1</sup>  | 3.047(2)  | S1-O3 <sup>1</sup>  | 1.380(2)  |
| Ag4-Ag5               | 3.374(6)  | S6-Ag0B             | 2.555(14) |
| Ag4-S4                | 2.449(4)  | S5-Ag0B             | 2.452(8)  |
| Ag4-S6 <sup>1</sup>   | 2.544(5)  | O9-Ag               | 2.010(3)  |
| Ag4-O8                | 2.310(11) | O2-O4 <sup>1</sup>  | 1.370(3)  |
| Ag10-S4 <sup>2</sup>  | 2.531(4)  | O2-O3 <sup>1</sup>  | 1.340(3)  |
| Ag10-S3 <sup>2</sup>  | 2.540(5)  | O1-O4 <sup>1</sup>  | 1.680(4)  |
| Ag10-O12              | 2.349(15) | O4-O3 <sup>1</sup>  | 1.430(4)  |
| Ag8-Ag5 <sup>1</sup>  | 3.270(12) |                     |           |

<sup>1</sup>3/2-X, 3/2-Y, 1-Z; <sup>2</sup>3/2-X, -1/2+Y, 1/2-Z; <sup>3</sup>2-X, 1-Y, 1-Z
